# Supplementary material
Source: publisher figshare collection journal article supplement (https://sage.figshare.com/ndownloader/files/13370024)
Supplement: Supplementary file 1 [file 13370024]

## APPENDIX 1

**Table A 1      Effect of yarn type on wetting of double-face knitted fabrics**

| Source of Variation | SS       | df | MS       | F        | P-value  | F crit   |
|---------------------|----------|----|----------|----------|----------|----------|
| Between Groups      | 228017.3 | 3  | 76005.77 | 14236.25 | 2.22E-55 | 2.866266 |
| Within Groups       | 192.2    | 36 | 5.338889 |          |          |          |
|                     |          |    |          |          |          |          |
| Total               | 228209.5 | 39 |          |          |          |          |

**Table A 2      Effect of yarn type to absorb 1 ml of water of double-face knitted fabrics**

| Source of Variation | SS       | df | MS       | F        | P-value  | F crit   |
|---------------------|----------|----|----------|----------|----------|----------|
| Between Groups      | 115378.1 | 3  | 38459.37 | 12473.31 | 2.39E-54 | 2.866266 |
| Within Groups       | 111      | 36 | 3.083333 |          |          |          |
|                     |          |    |          |          |          |          |
| Total               | 115489.1 | 39 |          |          |          |          |

**Table A 3      Effect of yarn type to spread 1 ml of water on face side of top layer of double-face knitted fabrics**

| Source of Variation | SS      | df | MS       | F        | P-value  | F crit   |
|---------------------|---------|----|----------|----------|----------|----------|
| Between Groups      | 15303.8 | 3  | 5101.267 | 2774.103 | 1.27E-42 | 2.866266 |
| Within Groups       | 66.2    | 36 | 1.838889 |          |          |          |
|                     |         |    |          |          |          |          |
| Total               | 15370   | 39 |          |          |          |          |

**Table A 4      Effect of yarn type to spread 1 ml of water on face side of bottom layer of double-face knitted fabrics**

| Source of Variation | SS      | df | MS       | F       | P-value  | F crit   |
|---------------------|---------|----|----------|---------|----------|----------|
| Between Groups      | 37716.5 | 3  | 12572.17 | 6374.62 | 4.16E-49 | 2.866266 |
| Within Groups       | 71      | 36 | 1.972222 |         |          |          |
|                     |         |    |          |         |          |          |
| Total               | 37787.5 | 39 |          |         |          |          |

**Table A 5      Effect of yarn type to absorb water in reaching saturation of double-face knitted fabrics**

| Source of Variation | SS       | df | MS       | F        | P-value  | F crit   |
|---------------------|----------|----|----------|----------|----------|----------|
| Between Groups      | 114711.7 | 3  | 38237.23 | 18064.83 | 3.06E-57 | 2.866266 |
| Within Groups       | 76.2     | 36 | 2.116667 |          |          |          |
|                     |          |    |          |          |          |          |
| Total               | 114787.9 | 39 |          |          |          |          |

**Table A 6      Effect of yarn type to spread water in reaching saturation of double-face knitted fabrics**

| Source of Variation | SS       | df | MS       | F        | P-value  | F crit   |
|---------------------|----------|----|----------|----------|----------|----------|
| Between Groups      | 29380.48 | 3  | 9793.492 | 5483.137 | 6.23E-48 | 2.866266 |
| Within Groups       | 64.3     | 36 | 1.786111 |          |          |          |
|                     |          |    |          |          |          |          |
| Total               | 29444.78 | 39 |          |          |          |          |

**Table A 7      Effect of yarn type on wicking in wale wise direction of double-face knitted fabrics**

| Source of Variation | SS       | df | MS       | F       | P-value  | F crit   |
|---------------------|----------|----|----------|---------|----------|----------|
| Between Groups      | 91.04275 | 3  | 30.34758 | 2500.03 | 8.18E-42 | 2.866266 |
| Within Groups       | 0.437    | 36 | 0.012139 |         |          |          |
|                     |          |    |          |         |          |          |
| Total               | 91.47975 | 39 |          |         |          |          |

**Table A 8      Effect of yarn type on wicking in course wise direction of double-face knitted fabrics**

| Source of Variation | SS     | df | MS       | F        | P-value  | F crit   |
|---------------------|--------|----|----------|----------|----------|----------|
| Between Groups      | 93.446 | 3  | 31.14867 | 1519.447 | 6.04E-38 | 2.866266 |
| Within Groups       | 0.738  | 36 | 0.0205   |          |          |          |
|                     |        |    |          |          |          |          |
| Total               | 94.184 | 39 |          |          |          |          |

**Table A 9      Effect of yarn type on moisture vapour transfer in reduction in height of water of double-face knitted fabrics**

| Source of Variation | SS       | df | MS       | F        | P-value  | F crit   |
|---------------------|----------|----|----------|----------|----------|----------|
| Between Groups      | 558.1348 | 3  | 186.0449 | 5512.442 | 5.66E-48 | 2.866266 |
| Within Groups       | 1.215    | 36 | 0.03375  |          |          |          |
|                     |          |    |          |          |          |          |
| Total               | 559.3498 | 39 |          |          |          |          |

**Table A 10    Effect of yarn type on moisture vapour transfer in reduction in weight of water of double-face knitted fabrics**

| Source of Variation | SS       | df | MS       | F        | P-value  | F crit   |
|---------------------|----------|----|----------|----------|----------|----------|
| Between Groups      | 148.0828 | 3  | 49.36094 | 11211.32 | 1.63E-53 | 2.866266 |
| Within Groups       | 0.1585   | 36 | 0.004403 |          |          |          |
|                     |          |    |          |          |          |          |
| Total               | 148.2413 | 39 |          |          |          |          |

**Table A 11    Effect of yarn type on drying rate of double-face knitted fabrics**

| Source of Variation | SS      | df | MS       | F        | P-value  | F crit   |
|---------------------|---------|----|----------|----------|----------|----------|
| Between Groups      | 268.001 | 3  | 89.33367 | 4800.018 | 6.79E-47 | 2.866266 |
| Within Groups       | 0.67    | 36 | 0.018611 |          |          |          |
|                     |         |    |          |          |          |          |
| Total               | 268.671 | 39 |          |          |          |          |

**Table A 12    Effect of yarn type on air permeability of double-face knitted fabrics**

| Source of Variation | SS     | df | MS       | F        | P-value  | F crit   |
|---------------------|--------|----|----------|----------|----------|----------|
| Between Groups      | 1544.6 | 3  | 514.8667 | 320.6782 | 5.13E-26 | 2.866266 |
| Within Groups       | 57.8   | 36 | 1.605556 |          |          |          |
|                     |        |    |          |          |          |          |
| Total               | 1602.4 | 39 |          |          |          |          |

**Table A 13    Effect of yarn type on thermal conductivity of double-face knitted fabrics**

| Source of Variation | SS       | df | MS       | F        | P-value  | F crit   |
|---------------------|----------|----|----------|----------|----------|----------|
| Between Groups      | 0.002946 | 3  | 0.000982 | 720.0672 | 3.54E-32 | 2.866266 |
| Within Groups       | 4.91E-05 | 36 | 1.36E-06 |          |          |          |
|                     |          |    |          |          |          |          |
| Total               | 0.002995 | 39 |          |          |          |          |
